# Supplementary material
Source: Copernicus journal article supplement (doi:10.5194/egusphere-2024-4041)
Supplement: Supplementary file 1 [file egusphere-2024-4041-supplement.pdf]

1 *Supporting Information for:*  
2 **How COVID-19 related policies reshaped organic aerosol**  
3 **source contributions in central London**  
4

5 Gang I. Chen<sup>1\*</sup>, Anja H. Tremper<sup>1</sup>, Max Priestman<sup>1</sup>, Anna Font<sup>2</sup>, and David C. Green<sup>1,3</sup>  
6

7 <sup>1</sup>MRC Centre for Environment and Health, Environmental Research Group, Imperial College  
8 London, 86 Wood Lane, London, W12 0BZ, UK  
9

10 <sup>2</sup>IMT Nord Europe, Europe, Institut Mines-Télécom, Univ. Lille, Centre for Education, Research  
11 and Innovation in Energy Environment (CERI EE), 59000 Lille, France  
12

13 <sup>3</sup>HPRU in Environmental Exposures and Health, Imperial College London, 86 Wood Lane,  
14 London, W12 0BZ, UK  
15

16 \*Correspondence to: Gang I. Chen (gang.chen@imperial.ac.uk)

17

18

Table S 1 Criteria list to select the solutions from the rolling PMF analysis as recommended by (Chen et al., 2022).

|   | Criterion                                                                                        | Type                                  | Threshold                  | Comments                                                                                                                  |
|---|--------------------------------------------------------------------------------------------------|---------------------------------------|----------------------------|---------------------------------------------------------------------------------------------------------------------------|
| 1 | HOA vs NO <sub>x</sub>                                                                           | R <sup>2</sup> , normal time series   | p-value ≤ 0.05             | Traffic factor has the best correlation with the NO <sub>x</sub> than other PMF factors                                   |
| 2 | Explained Variation [60] by BBOA                                                                 | Average, normal time series           | to-factor (p-value ≤ 0.05) | Investigate the explained variation of m/z 60 by BBOA, make sure it explained most of 60 variabilities by this fresh BBOA |
| 3 | (HOA+BBOA) vs BC                                                                                 | R <sup>2</sup> , normal time series   | to-factor (p-value ≤ 0.05) | To ensure HOA and BBOA explain the fresh black carbon emission at Honor oak park                                          |
| 4 | $\frac{(\text{COA}[13] + \text{COA}[14])/2}{(\text{COA}[8] + \text{COA}[9] + \text{COA}[10])/3}$ | Average, hours                        | >1                         | Make sure the lunch peak is larger than the morning rush hours to avoid mixing with HOA                                   |
| 5 | factor_4[44]                                                                                     | Profiles, fraction, sorting criterion | >0                         | Sorting criteria to make sure MO-OOA is situated at the 4 <sup>th</sup> position for all PMF runs                         |
| 6 | factor_4[43]                                                                                     | Profiles, fraction                    | >0                         | To ensure the intensity of m/z 43 in MO-OOA is larger than 0                                                              |
| 7 | factor_5[44]                                                                                     | Profiles, fraction                    | >0                         | To ensure the intensity of m/z 44 in LO-OOA is larger than 0                                                              |
| 8 | factor_5[43]                                                                                     | Profiles, fraction                    | >0                         | To ensure the intensity of m/z 43 in LO-OOA is larger than 0                                                              |

19

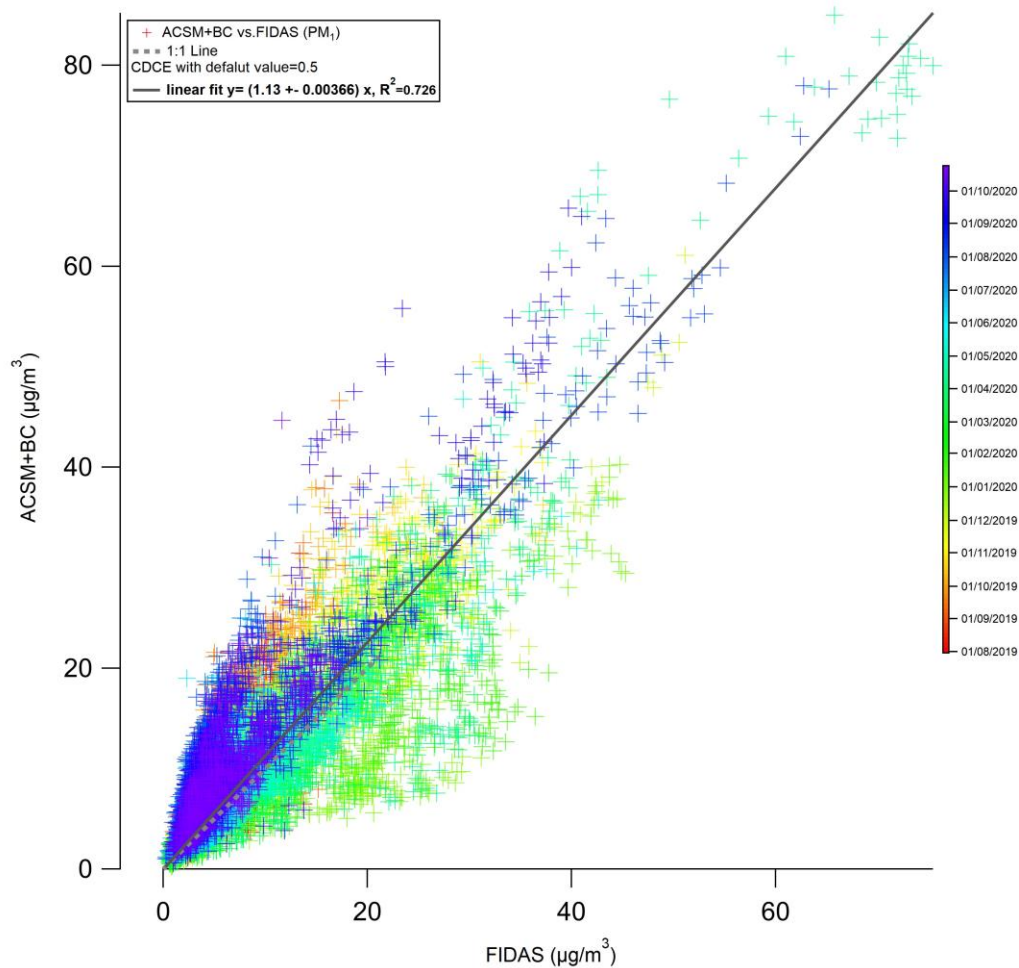

20

21

22

Figure S 1 Mass closure of ACSM plus BC concentration vs. FIDAS PM<sub>1</sub> concentration using the composition dependent collection efficiency (CDCE) correction with a default collection efficiency of 0.5 (Middlebrook et al., 2012).

23

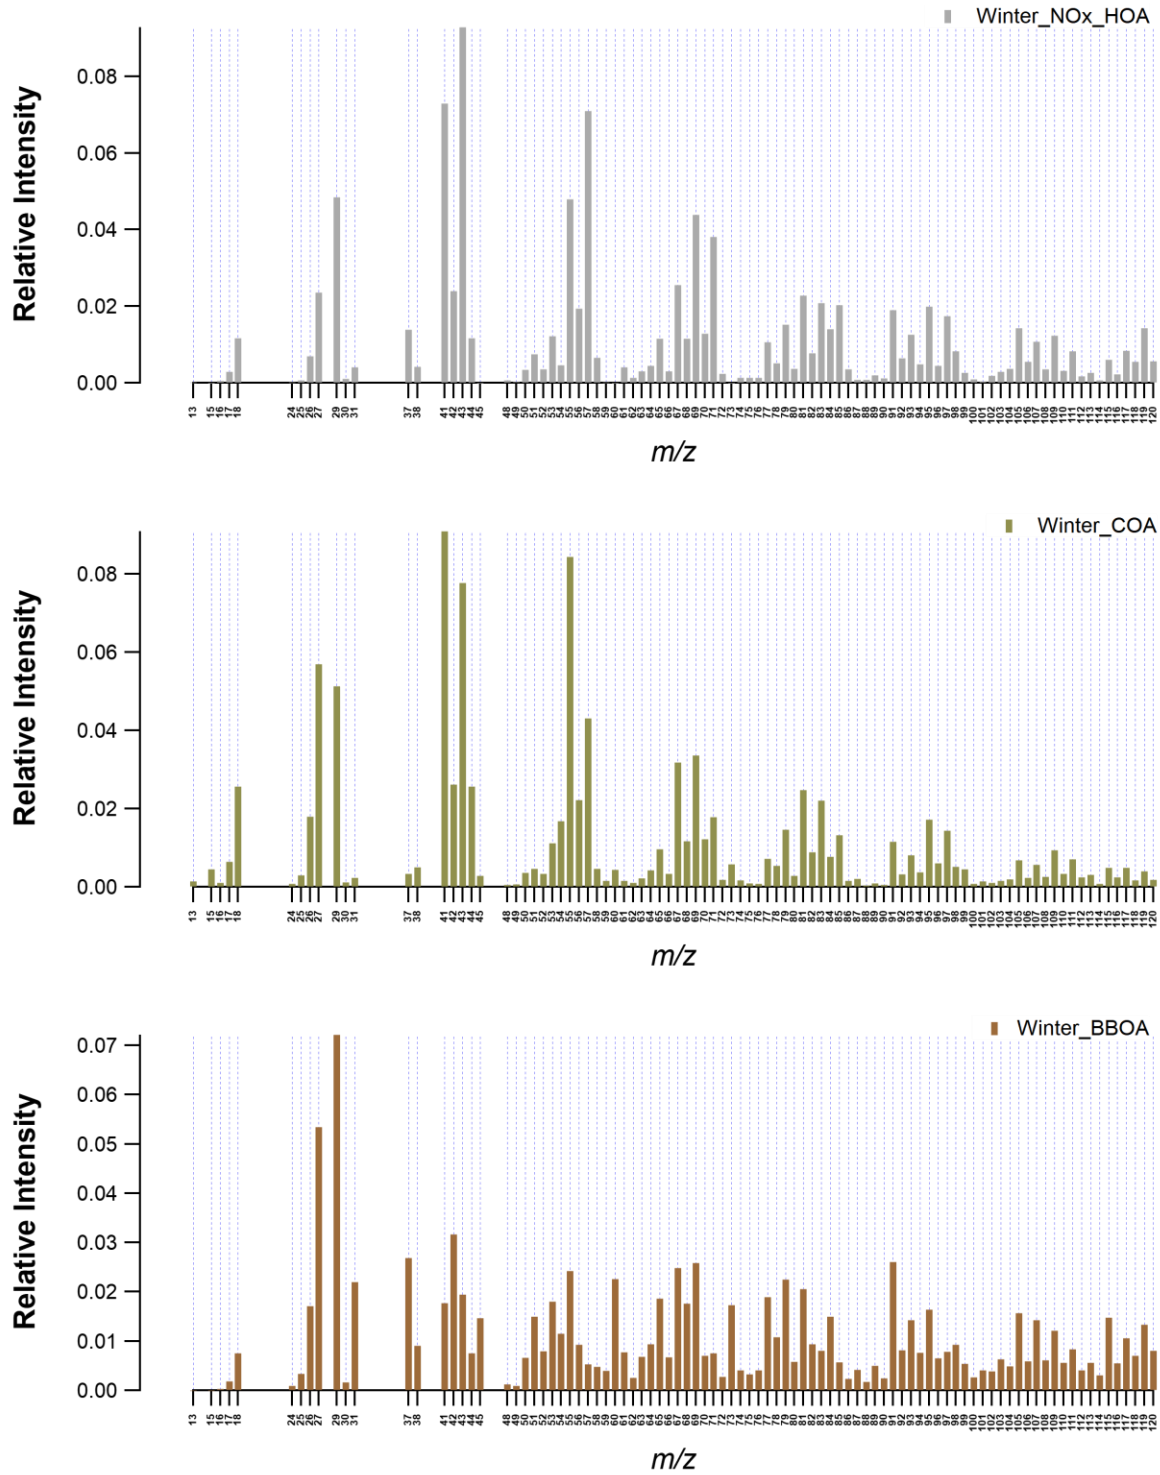

24

25 *Figure S 2 HOA, COA, and BBOA profiles used to constraint profiles in rolling PMF.*

26

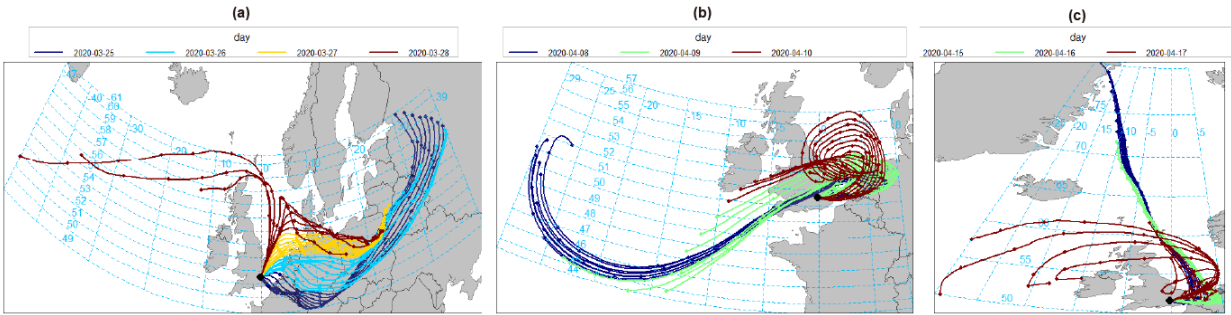

27

28

Figure S 3 Back trajectory analysis using HYSPLIT for three spikes in total PM.

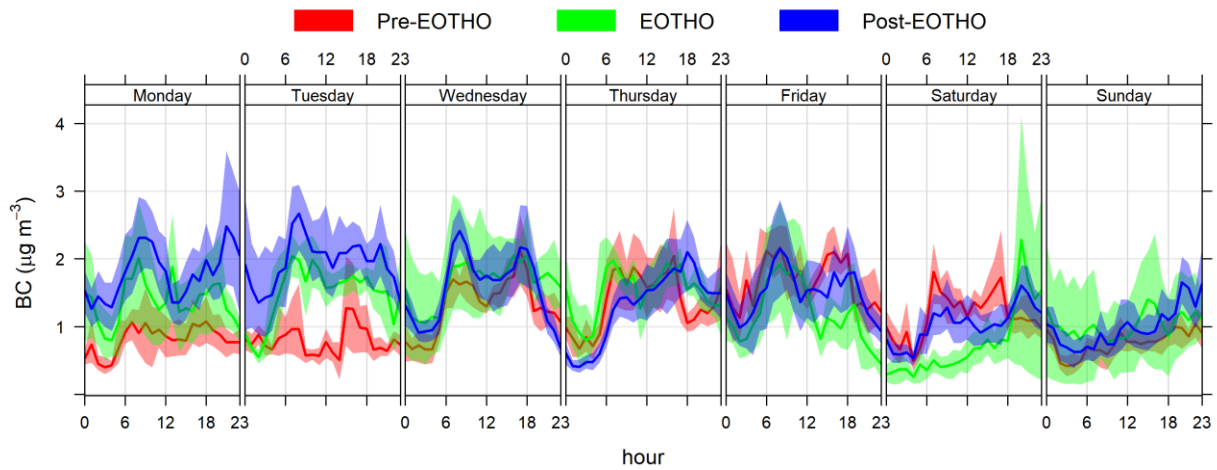

29

30  
31

Figure S 4. BC diurnal cycles of each weekday after the lockdown before (red), during (green) and after (blue) the eat out to help out (EOTHO) policy.

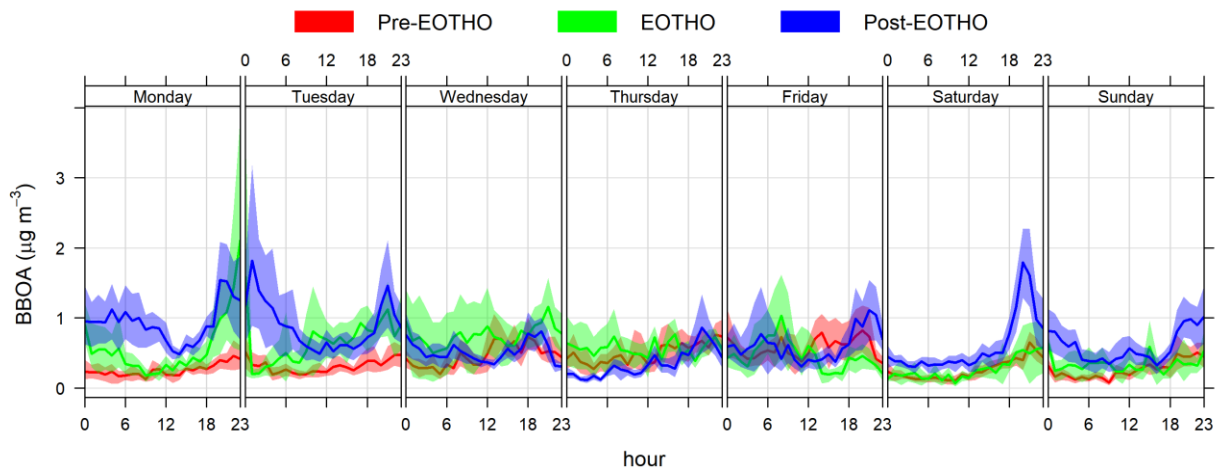

32

33  
34

Figure S 5. BBOA diurnal cycles of each weekday after the lockdown before (red), during (green) and after (blue) the eat out to help out (EOTHO) policy.

35

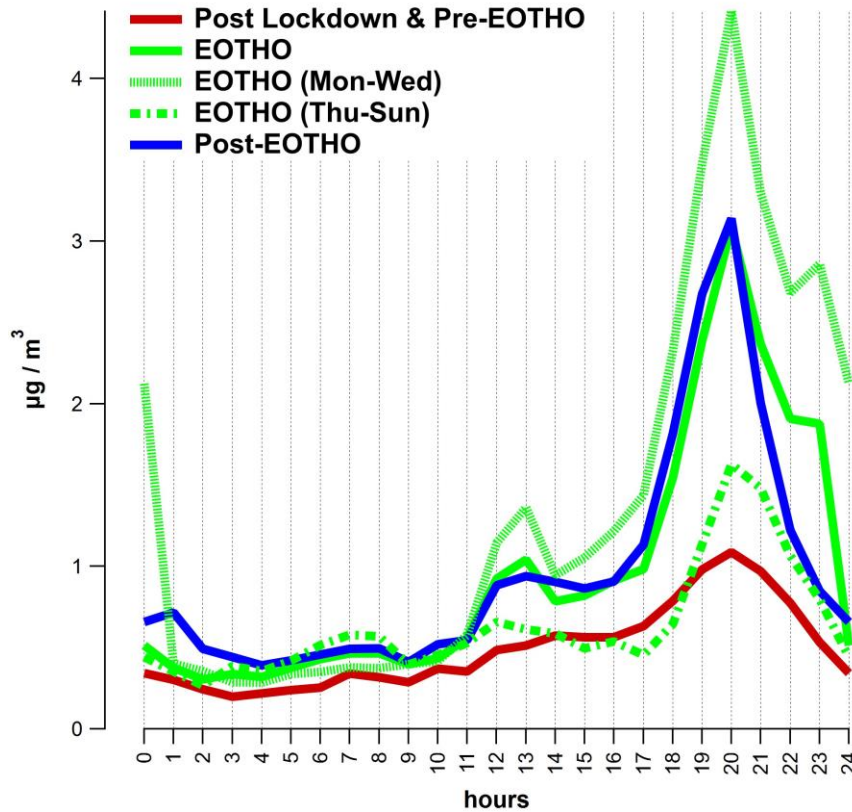

36

37 *Figure S 6 The diurnal cycle of COA during different periods after lockdown, in which the eat out to help out (EOTHO) policy*  
 38 *period was divided into Monday to Wednesday and Thursday to Sunday.*

## 39 References

- 40 Chen, G., Canonaco, F., Tobler, A., Aas, W., Alastuey, A., Allan, J., Atabakhsh, S., Aurela, M.,  
 41 Baltensperger, U., Bougiatioti, A., De Brito, J. F., Ceburnis, D., Chazeau, B., Chebaicheb, H.,  
 42 Daellenbach, K. R., Ehn, M., El Haddad, I., Eleftheriadis, K., Favez, O., Flentje, H., Font, A.,  
 43 Fossum, K., Freney, E., Gini, M., Green, D. C., Heikkinen, L., Herrmann, H., Kalogridis, A.-C.,  
 44 Keernik, H., Lhotka, R., Lin, C., Lunder, C., Maasikmets, M., Manousakas, M. I., Marchand, N.,  
 45 Marin, C., Marmureanu, L., Mihalopoulos, N., Močnik, G., Nečki, J., O'Dowd, C., Ovadnevaite,  
 46 J., Peter, T., Petit, J.-E., Pikridas, M., Matthew Platt, S., Pokorná, P., Poulain, L., Priestman, M.,  
 47 Riffault, V., Rinaldi, M., Rózański, K., Schwarz, J., Sciare, J., Simon, L., Skiba, A., Slowik, J. G.,

48 Sosedova, Y., Stavroulas, I., Styszko, K., Teinmaa, E., Timonen, H., Tremper, A., Vasilescu, J.,  
49 Via, M., Vodička, P., Wiedensohler, A., Zografou, O., Cruz Minguillón, M., and Prévôt, A. S. H.:  
50 European aerosol phenomenology – 8: Harmonised source apportionment of organic aerosol using  
51 22 Year-long ACSM/AMS datasets, *Environ Int*, 166, 107325,  
52 <https://doi.org/10.1016/j.envint.2022.107325>, 2022.

53 Middlebrook, A. M., Bahreini, R., Jimenez, J. L., and Canagaratna, M. R.: Evaluation of  
54 Composition-Dependent Collection Efficiencies for the Aerodyne Aerosol Mass Spectrometer  
55 using Field Data, *Aerosol Science and Technology*, 46, 258–271,  
56 <https://doi.org/10.1080/02786826.2011.620041>, 2012.

57
